# Supplementary material
Source: publisher figshare collection journal article supplement (https://aacr.figshare.com/ndownloader/files/39924732)
Supplement: Supplementary file 1 [file 39924732]

## Sheet: Sheet1
		Supplementary Table 4
	Hazard ratio	95% CI	P
Score****	63.7	10.8 to 376	< 0.0001
T-stage	0.906	0.612 to 1.34	0.622
Gender	0.960	0.505 to 1.83	0.902
Age*	1.03	1.00 to 1.06	0.038
TILs	0.934	0.452 to 1.93	0.853
Depth	1.42	0.951 to 2.12	0.086
Ulceration	0.760	0.339 to 1.71	0.506
